# Supplementary material
Source: PubMed Central journal article supplement (PMC8530167)
Supplement: deab089_supplementary_table_si.pdf [file deab089_supplementary_table_si.pdf]

**Supplementary Table S1** Baseline characteristics of women in the EAGeR and BioCycle cohorts by number of PMS symptoms.

|                                                                   | EAGeR       |                             |                             |         | BioCycle   |                  |                             |                             |         |
|-------------------------------------------------------------------|-------------|-----------------------------|-----------------------------|---------|------------|------------------|-----------------------------|-----------------------------|---------|
|                                                                   | Overall     | <5 moderate/severe symptoms | 5+ moderate/severe symptoms | p-value | Overall    | Vitamin D Subset | <5 moderate/severe symptoms | 5+ moderate/severe symptoms | p-value |
| <b>N</b>                                                          | <b>1170</b> | <b>889</b>                  | <b>281</b>                  |         | <b>259</b> | <b>72</b>        | <b>59</b>                   | <b>13</b>                   |         |
| <b>Age, years</b>                                                 | 28.8 ± 4.8  | 28.9 ± 4.8                  | 28.7 ± 4.8                  | 0.50    | 27.3 ± 8.2 | 28.8 ± 8.6       | 28.9 ± 8.9                  | 28.2 ± 7.7                  | 0.81    |
| <b>BMI, kg/m<sup>2</sup></b>                                      | 26.3 ± 6.5  | 26 ± 6.2                    | 27.2 ± 7.2                  | 0.006   | 24.1 ± 3.9 | 23.6 ± 3.6       | 23.7 ± 3.8                  | 23.4 ± 2.3                  | 0.82    |
| <b>Race, n (%)</b>                                                |             |                             |                             |         |            |                  |                             |                             |         |
| White                                                             | 1113 (95.1) | 845 (95.1)                  | 268 (95.4)                  | 1.00    | 148 (59.2) | 72 (100)         | 59 (100)                    | 13 (100)                    | 1.00    |
| Non-White                                                         | 57 (4.9)    | 44 (4.9)                    | 13 (4.6)                    |         | 102 (40.8) | 0 (0)            | 0 (0)                       | 0 (0)                       |         |
| <b>Married or living with partner, n (%)</b>                      | 1147 (98)   | 868 (97.6)                  | 279 (99.3)                  | 0.09    | 65 (26)    | 26 (36.1)        | 21 (35.6)                   | 5 (38.5)                    | 1.00    |
| <b>Education &gt; high school, n (%)</b>                          | 995 (87.6)  | 755 (87.6)                  | 240 (87.6)                  | 1.00    | 226 (87.3) | 66 (91.7)        | 55 (93.2)                   | 11 (84.6)                   | 0.30    |
| <b>Income, n (%)</b>                                              |             |                             |                             |         |            |                  |                             |                             |         |
| ≥ \$100 000                                                       | 471 (40.3)  | 352 (39.6)                  | 119 (42.3)                  | 0.65    | 24 (9.3)   | 8 (11.1)         | 7 (11.9)                    | 1 (7.7)                     | 0.93    |
| \$75 000–\$99 999                                                 | 146 (12.5)  | 118 (13.3)                  | 28 (10)                     |         | 45 (17.5)  | 12 (16.7)        | 9 (15.3)                    | 3 (23.1)                    |         |
| \$40 000–\$74 999                                                 | 177 (15.1)  | 136 (15.3)                  | 41 (14.6)                   |         | 72 (28)    | 27 (37.5)        | 23 (39)                     | 4 (30.8)                    |         |
| \$20 000–\$39 999                                                 | 293 (25)    | 220 (24.7)                  | 73 (26)                     |         | 61 (23.7)  | 14 (19.4)        | 11 (18.6)                   | 3 (23.1)                    |         |
| ≤ \$19 999                                                        | 83 (7.1)    | 63 (7.1)                    | 20 (7.1)                    |         | 55 (21.4)  | 11 (15.3)        | 9 (15.3)                    | 2 (15.4)                    |         |
| <b>Current smokers, n (%)</b>                                     | 140 (12)    | 100 (11.3)                  | 40 (14.3)                   | 0.21    | 10 (3.9)   | 5 (6.9)          | 4 (6.8)                     | 1 (7.7)                     | 1.00    |
| <b>Parity, n (%)</b>                                              |             |                             |                             |         |            |                  |                             |                             |         |
| Nulliparous                                                       | 543 (46.4)  | 397 (44.7)                  | 146 (52)                    | 0.03    | 187 (73.9) | 49 (69)          | 40 (69)                     | 9 (69.2)                    | 1.00    |
| Parous (1 or 2 prior live births)                                 | 627 (53.6)  | 492 (55.3)                  | 135 (48)                    |         | 66 (26.1)  | 22 (31)          | 18 (31)                     | 4 (30.8)                    |         |
| <b>Ever used hormonal contraception/meds, n (%)</b>               | 929 (80.3)  | 709 (80.7)                  | 220 (79.1)                  | 0.60    | 140 (54.9) | 44 (62)          | 39 (67.2)                   | 5 (38.5)                    | 0.07    |
| <b>Age at menarche, years</b>                                     | 12.7 ± 1.5  | 12.8 ± 1.5                  | 12.5 ± 1.6                  | 0.04    | 12.5 ± 1.2 | 12.4 ± 1.2       | 12.4 ± 1.3                  | 12.7 ± 1.2                  | 0.10    |
| <b>Age for periods to become regular, year</b>                    | 14.3 ± 4.5  | 14.4 ± 4.4                  | 14.2 ± 4.9                  | 0.52    | 14.8 ± 2.9 | 12.5 ± 1         | 12.4 ± 1.1                  | 12.8 ± 0.9                  | 0.32    |
| <b>Usual menstrual bleeding, days</b>                             | 5.1 ± 1.7   | 5 ± 1.3                     | 5.2 ± 2.6                   | 0.04    | 5.1 ± 1.1  | 6 ± 0.3          | 6 ± 0.3                     | 6.1 ± 0.3                   | 0.60    |
| <b>Usual cycle length over last 12 months, days</b>               | 29.3 ± 4    | 29.2 ± 3.9                  | 29.5 ± 4.4                  | 0.34    | 28.4 ± 2.2 | 28.2 ± 2.4       | 28.1 ± 2.5                  | 28.8 ± 1.7                  | 0.41    |
| <b>Shortest cycle length in last 12 months, days</b>              | 26.2 ± 4.5  | 26.3 ± 4.3                  | 25.9 ± 5                    | 0.29    | 25.3 ± 3.7 | 25 ± 3.7         | 24.8 ± 3.8                  | 25.8 ± 3.4                  | 0.40    |
| <b>Longest cycle in last 12 months, days</b>                      | 33.9 ± 9.8  | 33.6 ± 9.8                  | 34.8 ± 10                   | 0.08    | 31.3 ± 6.2 | 31.4 ± 5.3       | 31.4 ± 5.7                  | 31.1 ± 2.7                  | 0.84    |
| <b>Describe regularity of period in the last 12 months, n (%)</b> |             |                             |                             |         |            |                  |                             |                             |         |
| Yes                                                               | 963 (82.9)  | 744 (84.4)                  | 219 (78.2)                  | 0.03    | 249 (96.1) | 3 (4.2)          | 2 (3.4)                     | 1 (7.7)                     | 0.46    |
| No                                                                | 143 (12.3)  | 96 (10.9)                   | 47 (16.8)                   |         | 6 (2.3)    | 68 (94.4)        | 56 (94.9)                   | 12 (92.3)                   |         |
| Don't know                                                        | 56 (4.8)    | 42 (4.8)                    | 14 (5)                      |         | 4 (1.5)    | 1 (1.4)          | 1 (1.7)                     | 0 (0)                       |         |
| <b>Number of previous pregnancy losses, n (%)</b>                 |             |                             |                             |         |            |                  |                             |                             |         |
| 0                                                                 | 783 (66.9)  | 593 (66.7)                  | 190 (67.6)                  | 0.83    | 43 (55.8)  | 15 (62.5)        | 11 (55)                     | 4 (100)                     | 0.38    |
| 1                                                                 |             |                             |                             |         | 22 (28.6)  | 8 (33.3)         | 8 (40)                      | 0 (0)                       |         |

(continued)

**Supplementary Table S1 Continued**

|                                         | EAGeR                    |                                    |                                    | BioCycle   |                     |                                    |                                    |         |
|-----------------------------------------|--------------------------|------------------------------------|------------------------------------|------------|---------------------|------------------------------------|------------------------------------|---------|
|                                         | Overall                  | <5 moderate/<br>severe<br>symptoms | 5+ moderate/<br>severe<br>symptoms | Overall    | Vitamin D<br>Subset | <5 moderate/<br>severe<br>symptoms | 5+ moderate/<br>severe<br>symptoms | p-value |
| 2                                       | 387 (33.1)               | 296 (33.3)                         | 91 (32.4)                          | 10 (13)    | 1 (4.2)             | 1 (5)                              | 0 (0)                              |         |
| 3                                       |                          |                                    |                                    | 2 (2.6)    | 0 (0)               | 0 (0)                              | 0 (0)                              |         |
| <b>SSRI exposure at baseline, n (%)</b> |                          |                                    |                                    |            |                     |                                    |                                    |         |
| Yes                                     | 163 (14)                 | 105 (11.9)                         | 58 (20.9)                          | 0.0003     | NA                  | NA                                 | NA                                 |         |
| No                                      | 999 (86)                 | 779 (88.1)                         | 220 (79.1)                         |            | NA                  | NA                                 | NA                                 |         |
| <b>Depression scale</b>                 |                          |                                    |                                    | 4.7 ± 1.4  | 4.7 ± 1.4           | 4.4 ± 1.3                          | 6.6 ± 1.2                          | <0.0001 |
| <b>Alcohol intake, n(%)</b>             |                          |                                    |                                    |            |                     |                                    |                                    |         |
| Often                                   | 26 (2.2)                 | 21 (2.4)                           | 5 (1.8)                            | 0.53       | 7 (9.7)             | 6 (10.2)                           | 1 (7.7)                            | 1.00    |
| Sometimes                               | 361 (31.2)               | 268 (30.4)                         | 93 (33.7)                          | 153 (59.1) | 53 (73.6)           | 43 (72.9)                          | 10 (76.9)                          |         |
| Never                                   | 771 (66.6)               | 593 (67.2)                         | 178 (64.5)                         | 87 (33.6)  | 12 (16.7)           | 10 (16.9)                          | 2 (15.4)                           |         |
| <b>CRP, mg/L<sup>a</sup></b>            | 1.14 ± 2.90 <sup>b</sup> | 1.09 ± 2.89                        | 1.30 ± 2.92                        | 0.02       | 0.68 ± 2.33         | 0.67 ± 2.31                        | 0.73 ± 2.52                        | 0.75    |

CRP, high sensitivity c-reactive protein; EAGeR, Effects of Aspirin in Gestation and Reproduction; PMS, premenstrual syndrome; SSRI, selective serotonin reuptake inhibitors.

<sup>a</sup>Geometric mean and Geometric SD.

<sup>b</sup>Excluding CRP > 10 mg/L.
