# Supplementary material
Source: PubMed Central journal article supplement (PMC8530167)
Supplement: deab089_supplementary_table_sii.pdf [file deab089_supplementary_table_sii.pdf]

**Supplementary Table SII** Associations between serum 25(OH)D concentrations and moderate/severe physical and psychological premenstrual symptoms during the premenstrual week in reproductive age women with regular cycles in the EAGeR study, stratified by season.

|               | 25(OH)D                  | Total moderate/severe premenstrual symptoms<br>Adjusted $\beta$ (95% CI) | Total moderate/severe physical symptoms<br>Adjusted $\beta$ (95% CI) | Total moderate/severe psychological symptoms<br>Adjusted $\beta$ (95% CI) |
|---------------|--------------------------|--------------------------------------------------------------------------|----------------------------------------------------------------------|---------------------------------------------------------------------------|
| <b>Spring</b> | $\leq 30$ vs $>30$ ng/ml | 0.05 (−0.62, 0.71)                                                       | 0.25 (−0.20, 0.71)                                                   | −0.21 (−0.55, 0.13)                                                       |
|               | per 10 ng/ml             | −0.06 (−0.35, 0.24)                                                      | −0.09 (−0.29, 0.11)                                                  | 0.03 (−0.12, 0.18)                                                        |
| <b>Summer</b> | $\leq 30$ vs $>30$ ng/ml | 0.78 (−0.04, 1.61)                                                       | 0.40 (−0.19, 0.98)                                                   | 0.39 (−0.01, 0.79)                                                        |
|               | per 10 ng/ml             | <b>−0.51 (−0.90, −0.11)</b>                                              | <b>−0.33 (−0.61, −0.05)</b>                                          | −0.18 (−0.37, 0.01)                                                       |
| <b>Fall</b>   | $\leq 30$ vs $>30$ ng/ml | 0.10 (−0.62, 0.81)                                                       | −0.05 (−0.54, 0.45)                                                  | 0.14 (−0.23, 0.51)                                                        |
|               | per 10 ng/ml             | 0.05 (−0.26, 0.36)                                                       | 0.05 (−0.17, 0.26)                                                   | 0.00 (−0.16, 0.16)                                                        |
| <b>Winter</b> | $\leq 30$ vs $>30$ ng/ml | 0.36 (−0.47, 1.19)                                                       | 0.54 (−0.02, 1.10)                                                   | −0.18 (−0.58, 0.22)                                                       |
|               | per 10 ng/ml             | 0.03 (−0.25, 0.31)                                                       | −0.06 (−0.25, 0.13)                                                  | 0.10 (−0.04, 0.23)                                                        |

25(OH)D, 25-hydroxyvitamin D; EAGeR, Effects of Aspirin in Gestation and Reproduction.

Bold results are significant at  $\alpha = 0.05$ .

Models adjusted for age, BMI, smoking status, race, income, exercise.
