# Supplementary material
Source: PubMed Central journal article supplement (PMC8530167)
Supplement: deab089_supplementary_table_siii.pdf [file deab089_supplementary_table_siii.pdf]

**Supplementary Table SIII Association between serum 25(OH)D concentrations and premenstrual symptom scores by group during the premenstrual week in two cohorts of reproductive age women with regular cycles: EAGeR and BioCycle.**

|                            | EAGeR                                 |                                         |                           | BioCycle                              |                                         |                           |
|----------------------------|---------------------------------------|-----------------------------------------|---------------------------|---------------------------------------|-----------------------------------------|---------------------------|
|                            | 25(OH)D<br>sufficient<br>(≥ 30 ng/ml) | 25(OH)D<br>insufficient<br>(< 30 ng/ml) | 25(OH)D<br>(per 10 ng/ml) | 25(OH)D<br>sufficient<br>(≥ 30 ng/ml) | 25(OH)D<br>insufficient<br>(< 30 ng/ml) | 25(OH)D<br>(per 10 ng/ml) |
| <b>Emotional score</b>     |                                       |                                         |                           |                                       |                                         |                           |
| Mean ± SD                  | 3.0 ± 1.9                             | 3.0 ± 2.0                               |                           | 2.2 ± 1.6                             | 2.7 ± 1.6                               |                           |
| Unadjusted β (95% CI)      | Ref                                   | 0.07 (−0.16, 0.30)                      | −0.02 (−0.12, 0.07)       | Ref                                   | 0.57 (−0.19, 1.33)                      | −0.25 (−0.69, 0.19)       |
| Adjusted 1: β (95% CI)     | Ref                                   | −0.03 (−0.27, 0.21)                     | 0.02 (−0.08, 0.12)        | Ref                                   | 0.55 (−0.23, 1.33)                      | −0.21 (−0.68, 0.25)       |
| Adjusted 2: β (95% CI)     | Ref                                   | 0.01 (−0.23, 0.26)                      | 0.01 (−0.09, 0.11)        | Ref                                   | 0.31 (−0.13, 0.76)                      | −0.08 (−0.34, 0.18)       |
| <b>Psychological score</b> |                                       |                                         |                           |                                       |                                         |                           |
| Mean ± SD                  | 1.9 ± 1.8                             | 1.9 ± 1.8                               |                           | 1.9 ± 1.3                             | 1.8 ± 1.5                               |                           |
| Unadjusted β (95% CI)      | Ref                                   | 0.05 (−0.16, 0.25)                      | 0.01 (−0.07, 0.10)        | Ref                                   | −0.17 (−0.82, 0.47)                     | −0.06 (−0.43, 0.30)       |
| Adjusted 1: β (95% CI)     | Ref                                   | −0.01 (−0.23, 0.20)                     | 0.04 (−0.05, 0.13)        | Ref                                   | −0.11 (−0.81, 0.60)                     | −0.09 (−0.50, 0.32)       |
| Adjusted 2: β (95% CI)     | Ref                                   | 0.03 (−0.19, 0.25)                      | 0.03 (−0.07, 0.12)        | Ref                                   | −0.48 (−1.08, 0.12)                     | 0.12 (−0.23, 0.48)        |
| <b>Physical score</b>      |                                       |                                         |                           |                                       |                                         |                           |
| Mean ± SD                  | 4.6 ± 2.9                             | 5.0 ± 3.1                               |                           | 4.4 ± 2.9                             | 4.6 ± 2.4                               |                           |
| Unadjusted β (95% CI)      | Ref                                   | 0.45 (0.10, 0.80)*                      | −0.14 (−0.28, 0.003)      | Ref                                   | 0.20 (−1.05, 1.45)                      | −0.28 (−0.99, 0.43)       |
| Adjusted 1: β (95% CI)     | Ref                                   | 0.22 (−0.14, 0.58)                      | −0.03 (−0.18, 0.12)       | Ref                                   | 0.02 (−1.36, 1.39)                      | −0.15 (−0.96, 0.66)       |
| Adjusted 2: β (95% CI)     | Ref                                   | 0.24 (−0.13, 0.61)                      | −0.04 (−0.20, 0.11)       | Ref                                   | 0.03 (−1.47, 1.52)                      | −0.16 (−1.02, 0.70)       |
| <b>Consumption score</b>   |                                       |                                         |                           |                                       |                                         |                           |
| Mean ± SD                  | 2.2 ± 1.3                             | 2.3 ± 1.4                               |                           | 2.2 ± 1.2                             | 2.0 ± 1.6                               |                           |
| Unadjusted β (95% CI)      | Ref                                   | 0.13 (−0.03, 0.28)                      | −0.03 (−0.09, 0.04)       | Ref                                   | −0.23 (−0.89, 0.43)                     | 0.14 (−0.24, 0.51)        |
| Adjusted 1: β (95% CI)     | Ref                                   | 0.08 (−0.08, 0.25)                      | −0.01 (−0.07, 0.06)       | Ref                                   | −0.24 (−0.96, 0.48)                     | 0.10 (−0.33, 0.52)        |
| Adjusted 2: β (95% CI)     | Ref                                   | 0.08 (−0.09, 0.25)                      | −0.01 (−0.08, 0.06)       | Ref                                   | −0.33 (−1.10, 0.44)                     | 0.16 (−0.29, 0.60)        |

25(OH)D, 25-hydroxyvitamin D; EAGeR, Effects of Aspirin in Gestation and Reproduction; Ref, reference.

Adjusted 1 model controls for age, BMI, smoking status, race, income, exercise, season of blood draw. Adjusted 2 model controls for the variables in Adjusted 1 as well as depression (BioCycle) or antidepressant use (EAGeR), education, alcohol, race (EAGeR only), CRP (high sensitivity c-reactive protein), and parity.

Scores based on the sum of symptom severity ratings reported during the premenstrual week for symptoms within each grouping (0 = none, 1 = mild, 2 = moderate, 3 = severe). Groups based on the clusters identified using factor analysis in prior work by Quintana-Zinn *et al.* (2017). Emotional score includes the symptoms: tension or irritability; anger, aggression, short temper; crying spells. Psychological score includes the symptoms: depression or sadness; anxiety or nervousness; insomnia. Physical score includes the symptoms: breast tenderness or fullness; lower abdominal cramping; generalized aches and pains; lower backache; headache. Consumption score includes the symptoms: abdominal bloating; fatigue.
